1 **EMBED: a low dimensional reconstruction of subject-specific gut**  
2 **microbiome dynamics based on ecological normal modes**

3  
4 **Mayar Shahin<sup>1</sup>, Brian Ji<sup>2</sup>, and Purushottam D. Dixit<sup>1,3,4,5</sup>**

5  
6 <sup>1</sup>Department of Physics, University of Florida, Gainesville, FL 32611

7 <sup>2</sup>Physician-Scientist Training Pathway, Department of Medicine, UCSD, San Diego, CA 92103

8 <sup>3</sup>Genetics Institute, University of Florida, Gainesville, FL 32611

9 <sup>4</sup>Department of Chemical Engineering, University of Florida, Gainesville, FL 32611

10 <sup>5</sup>Corresponding author: Email: [pdixit@ufl.edu](mailto:pdixit@ufl.edu)

11  
12  
13  
14  
15  
16  
17  
18  
19  
20  
21  
22  
23  
24  
25  
26  
27  
28  
29  
30  
31  
32  
33  
34  
35  
36  
37  
38  
39  
40  
41  
42  
43

44  
45  
46  
47  
48  
49  
50  
51  
52  
53  
54  
55  
56  
57  
58  
59  
60  
61  
62  
63  
64  
65  
66  
67  
68  
69  
70  
71  
72  
73  
74  
75  
76  
77  
78  
79  
80  
81  
82  
83  
84  
85  
86

## **Abstract**

The gut microbiome ecosystem is a significant driver of host health and disease. High-throughput Longitudinal studies have begun to unravel the complex dynamics of these ecosystems, and quantitative frameworks are now being developed to understand their organizing principles. Dimensionality reduction offers unique insights into gut bacterial dynamics by leveraging collective abundance fluctuations of multiple bacteria across multiple subjects driven by similar underlying ecological factors. However, methods providing lower-dimensional representations of gut microbial dynamics both at the community and individual taxa level are currently missing. To that end, we develop EMBED: Essential Microbiome Dynamics. Similar to normal modes in structural biology, EMBED infers ecological normal modes (ECNs), which represent the unique set of orthogonal dynamical trajectories capturing the collective behavior of microbial communities across subjects. We show that a small number of ECNs accurately describe gut microbiome dynamics across multiple data sets. Importantly, we find that ECNs reflect specific ecological behaviors, providing natural templates along which the dynamics of individual bacteria may be partitioned. Moreover, the multi-subject treatment in EMBED systematically identifies subject-specific and universal dynamical processes. Collectively, our results highlight the utility of dimensionality reduction approaches to understanding the dynamics of the gut microbiome and provide a framework to study the dynamics of other high-dimensional systems as well.

87

## 88 **Introduction**

89

90 Deciphering the temporal dynamics of the human gut microbiome is essential to understanding  
91 its role in human health and disease. Advances in sequencing technologies have enabled the  
92 characterization of these complex ecosystems at unprecedented scale and resolution<sup>1,2</sup>. In  
93 contrast to static snapshots across large populations, high-resolution longitudinal studies offer  
94 unique insights into the biological processes structuring communities within individual hosts.  
95 For example, recent longitudinal studies have elucidated the determinants of the gut  
96 microbiome in early childhood<sup>3,4</sup>, the effects of the gut microbiome on outcomes following  
97 bone-marrow transplant<sup>5</sup>, and the recolonization of gut microbial communities following  
98 antibiotic perturbation<sup>6-10</sup>.

99

100 A significant challenge in understanding gut microbiome dynamics is its enormous  
101 organizational complexity, comprising thousands of individual bacterial species whose  
102 abundances vary substantially across space, time, and host ecosystems<sup>11-15</sup>. Systems biology  
103 approaches are now beginning to reveal broad-scale insights into the temporal behavior of the  
104 gut microbiome, including its defining features of long-term stability and resilience to  
105 perturbations<sup>16-20</sup>. More recently, methods have also been developed to address the significant  
106 technical challenges of inferring true relative abundances of bacteria from large-scale  
107 sequencing data<sup>21-23</sup>. Collectively, these studies have suggested that abundances of individual  
108 bacterial species do not fluctuate independently, but rather as a collective community with  
109 coordinated responses to factors such as host diet<sup>24,25</sup>, medications<sup>10,26</sup>, and environmental  
110 exposures<sup>12</sup>.

111

112 The correlated nature of bacterial abundance dynamics suggests that dimensionality reduction  
113 may offer unique insights by distilling the behavior of large communities into a handful of  
114 variables. Indeed, dimensionality reduction techniques are widely utilized in sequencing-based  
115 studies<sup>27</sup>. Popular approaches based on multidimensional scaling, such as principal coordinate  
116 analysis, have been seminal to understanding the organizing principles of the human

117 microbiome<sup>28-30</sup>. Other non-probabilistic approaches based on log-transformations do not  
118 account for zero abundances and technical sampling noise and could potentially lead to  
119 inaccurate reconstructions<sup>31,32</sup>. Crucially, while these approaches may be useful in identifying  
120 broad shifts in the overall microbiome community, they lack information on the dynamics of  
121 individual bacterial taxa.

122

123 To that end, we have developed EMBED: Essential Microbiome Dynamics, a probabilistic  
124 reduced dimensional descriptor of gut microbiome dynamics that identifies the common  
125 dynamical templates of bacterial communities across multiple subjects exposed to the same  
126 perturbation. In EMBED, we model bacterial abundances using the exponential Gibbs-  
127 Boltzmann distribution<sup>33</sup> with unknown extensive and intensive variables that are learned  
128 directly from data (Fig. 1A). The Gibbs-Boltzmann distribution has its origins in statistical physics  
129 and can be thought of as a latent space embedding model with a *softmax* non-linearity. The  
130 result is a set of unique and orthogonal trajectories, which we refer to as *Ecological Normal*  
131 *Modes* (ECNs), that capture the collective temporal behavior of bacterial communities across  
132 multiple subjects. Moreover, our framework provides a set of “loadings”, that represent the  
133 contribution of each identified ECN to the dynamical profiles of individual bacterial taxa in  
134 individual subject-specific ecosystems. Thus, similar to how the principal components in  
135 principal component analysis (PCA) represent a lower dimensional basis to reconstruct  
136 community abundance profiles, ECNs represent a set of basis functions to reconstruct the  
137 dynamics of variation of abundances of individual bacterial taxa. In addition to providing an  
138 ecologically motivated description of bacterial dynamics, our approach has several salient  
139 features that are particularly well-suited for sequencing studies of the gut microbiome. First,  
140 EMBED utilizes the exponential Gibbs-Boltzmann distribution, which captures the extensive  
141 variability of the species abundances in the gut<sup>33</sup>. Second, by restricting the number of specified  
142 ECNS to be low, EMBED naturally provides a reduced-dimensional description of the community  
143 thereby filtering out potentially unimportant signal in the data<sup>13</sup>. Third, ECNs are inferred using  
144 a fully probabilistic method that further accounts for sequencing noise inherent in all  
145 microbiome studies<sup>13</sup>. Fourth, similar to the normal modes in biomolecular dynamics<sup>34</sup>, ECNs

146 represent the *unique* and *orthonormal* dynamical modes that represent statistically  
147 independent collective abundance fluctuations. Fifth, by treating individual subjects separately,  
148 EMBED systematically identifies universal and subject-specific dynamical behaviors and  
149 bacterial taxa that exhibit that behavior.

150  
151 We used EMBED to study several publicly available, high-resolution longitudinal data sets that  
152 encompass major ecological perturbations such as dietary changes and antibiotic  
153 administration<sup>10–12,25</sup>. EMBED accurately captured the dynamics in these communities with only  
154 a handful of ECNs, demonstrating the highly correlated nature of bacterial abundance dynamics  
155 and the efficacy of EMBED as a dimensionality reduction method. The identified ECNs reflected  
156 specific ecological behaviors, providing natural templates to reconstruct the dynamics of  
157 individual bacterial taxa. Indeed, we found major groups of bacteria that are partitioned  
158 according to their relative contributions along each of the identified ECNs which further  
159 indicates that the identified ECNs represent a collection of distinct ecological behaviors  
160 observed in the community. Additionally, subject-specific analyses identified universal and  
161 subject-specific dynamics and taxa exhibiting those dynamics. Collectively, our study provides  
162 an ecologically motivated dimensionality reduction framework to better understand dynamics  
163 in the gut microbiome.

164

## 165 **Results**

### 166 **EMBED identifies reduced-dimensional descriptors for longitudinal microbiome dynamics**

167 We sketch the mathematical foundation of identifying ecological normal modes using EMBED  
168 (Fig. 1A). A detailed derivation is found in the **Supplementary Information**. Briefly, we consider  
169 that microbial abundances  $n_{os}(t)$  are quantified across several taxa " $o$ ", subjects " $s$ ", and time  
170 points " $t$ ". We model the data  $n_{os}(t)$  as arising from a multinomial distribution:

$$p(\{n_{os}(t)\}) = \prod_{s,t} \frac{N_s(t)!}{\prod_o n_{os}(t)!} \prod_o q_{os}(t)^{n_{os}(t)} \quad (1)$$

171 where  $N_s(t) = \sum_o n_{os}(t)$  is the total read count on a given day  $t$  in the microbiome sample in  
172 subject  $s$ . The probabilities  $q_{os}(t)$  are modeled as a Gibbs-Boltzmann distribution<sup>33</sup>

$$q_{os}(t) = \frac{1}{\Omega_{st}} \exp\left(-\sum_{k=1}^K z_k(t)\theta_{kos}\right). \quad (2)$$

173 In Eq. 2,  $z_k(t)$  are time-specific latents that are shared by all OTUs and subjects, and  $\theta_{kos}$  are  
174 OTU- and subject-specific loadings that are shared across all time points. The number of  
175 latents/loadings is chosen such that  $K \ll O, T$  thereby achieving a lower dimensional  
176 description of the data. These parameters can be simultaneously estimated using log-likelihood  
177 maximization.

178

179 The long-term stability of the gut microbiome is now well-established<sup>14,15,18</sup>. Therefore, we  
180 model the dynamics of the latents as return to normal fluctuations around a fixed steady state:

$$\mathbf{z}(t+1) = \mathbf{A}\mathbf{z}(t) + \mathbf{u} + \boldsymbol{\varepsilon}. \quad (3)$$

181 In Eq. 3, the matrix  $\mathbf{A}$  is assumed to be symmetric and the noise  $\boldsymbol{\varepsilon}$  Gaussian distributed and  
182 uncorrelated. To identify ecological normal modes (ECNs)  $y_k(t)$  whose dynamics are  
183 statistically independent of each other, we diagonalize the interaction matrix,  $\mathbf{A} = \mathbf{v}^T \boldsymbol{\Lambda} \mathbf{v}$ . Here,  
184  $\mathbf{v}$  is the orthogonal matrix of eigenvectors and  $\boldsymbol{\Lambda}$  is the diagonal matrix of its eigenvalues. We  
185 have

$$y_k(t+1) = \Lambda_k y_k(t) + u'_k + \varepsilon'_k \quad (4)$$

186 Where the ECNs  $\mathbf{y}(t) = \mathbf{v}\mathbf{z}(t)$  are a redefined set of latents,  $\mathbf{u}' = \mathbf{v}\mathbf{u}$ , and  $\boldsymbol{\varepsilon}' = \mathbf{v}\boldsymbol{\varepsilon}$ . We  
187 redefine the corresponding loadings  $\boldsymbol{\Phi} = \mathbf{v}^T \boldsymbol{\theta}$ . Since  $\mathbf{v}\mathbf{v}^T = \mathbf{v}^T \mathbf{v} = \mathbf{I}$ , this simultaneous  
188 transformation does not change the model predictions<sup>33</sup>. Moreover, the redefined noise  $\boldsymbol{\varepsilon}'$  is  
189 Gaussian distributed and uncorrelated as well. Notably, if we start with orthonormal sets of  
190 latents  $z_k(t)$ , the ECNs are also orthonormal. As we show in the supplementary information,  
191 the ECNs are uniquely defined for a given longitudinal data set. The actual dynamics of the  
192 latents are likely to be more complex than the linear model invoked here. Yet, similar to normal  
193 mode analysis in biomolecular dynamics<sup>34</sup>, ECNs represent a re-orientation of the latent  
194 variable space that uncovers the *unique* and *orthogonal* templates of microbial abundance  
195 fluctuations.

196

197 **EMBED accurately reconstructs microbiome abundance time series using a few ecological**  
198 **normal modes**

199 We first highlight the intuition of EMBED with simple illustrative *in silico* examples (see  
200 **Supplementary Information** for details). The first community comprised OTUs whose  
201 abundances oscillated at a single frequency but with one of two phases. The second community  
202 comprised a single set of OTUs oscillating with high frequency and another set that fluctuated  
203 as a sum of two oscillations. The third community comprised a set of OTUs whose abundances  
204 decreased exponentially, and those whose abundances oscillated with one of two different  
205 frequencies. *In silico* data was generated by first normalizing the abundances and then sampling  
206 read counts from a multinomial distribution (SI Fig. 1). As expected, EMBED identified a small  
207 number of ECNs that were sufficient to capture the abundance variation in all three  
208 communities (SI Fig. 2). Importantly, the identified ECNs directly corresponded to salient  
209 dynamical features of the abundance profiles (SI Fig. 3). Specifically, ECN  $y_1(t)$  was relatively  
210 stable over time and the corresponding loading vector  $\Phi_1$  correlated strongly with the mean  
211 OTU abundance, capturing steady-state behavior of OTUs over longer time periods (SI Fig. 4).  
212 The rest of the ECNs separately captured other major features of the underlying dynamics: out  
213 of phase oscillations (A), three different oscillation frequencies (B), and exponential decay and  
214 oscillations at different frequencies (C). Finally, the inferred ECNs were uniquely determined for  
215 each community (SI Fig. 5). While simplified, these examples show how EMBED can be used to  
216 identify any existing modes of dynamics underlying complex microbial communities.

217

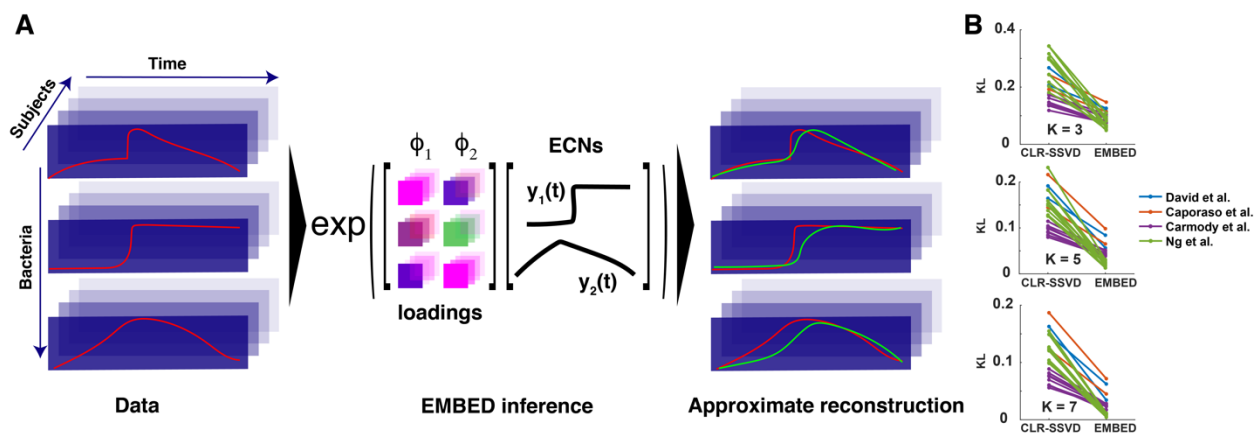

218

219 **Figure 1. (A) Schematic of the EMBED approach.** In the schematic, dynamics of abundance of a  
220 community comprising 3 bacteria (left) is approximated using  $K = 2$  ECNs  $\{y_k(t)\}$  and corresponding  
221 loadings  $\{\Phi_k\}$  (middle). From the abundance data, EMBED identifies ECNs that are shared across  
222 subjects. (right) The dynamics of abundances of individual bacteria are approximated using the inferred  
223 ECNs. **(B)** Average Kullback-Leibler divergence, averaged over the total duration, between observed  
224 microbial abundances and reduced dimensional reconstructions using CLR-SSVD and EMBED using  $K = 3,$   
225  $5,$  and  $7$  components.  
226

227  
228 Next, using several longitudinal microbiome time series, we investigate the accuracy of EMBED-  
229 based time series reconstruction. We compared EMBED with a recently developed method by  
230 Martino et al.<sup>31</sup> (centered log ratio transform followed by sparse singular valued decomposition  
231 or CLR-SSVD, see **Supplementary Information**). This dimensionality reduction method also  
232 forms a basis of a recent multi-subject analysis<sup>32</sup>. Briefly, non-zero microbiome abundances are  
233 log-transformed using the so-called robust centered log-ratio transform (CLR)<sup>35</sup>. Sparse singular  
234 value decomposition (SSVD)<sup>36</sup> is then performed, using a user-specified number of components,  
235 on these non-zero abundances. Finally, an inverse CLR transform is performed on the SSVD-  
236 based reconstruction. We investigated the ability of CLR-SSVD and EMBED to reconstruct the  
237 same time series using 23 abundance time-series from four different studies<sup>11,12,25,10</sup>. In Fig. 1B,  
238 we compare the mean Kullback-Leibler divergences (averaged over the total number of days for  
239 each time series) using  $K = 3, 5,$  and  $7$  components for EMBED- and for CLR-SSVD-based  
240 reconstructions. Notably, for each time series and each  $K$ , EMBED offered a more accurate  
241 representation of the data compared to CLR-SSVD (SI Table 1). EMBED-based reconstruction is  
242 also accurate for the time series of individual bacterial taxa. The average taxa-specific Pearson  
243 correlation coefficient between the reconstruction the data, averaged across taxa and datasets  
244 was  $r = 0.89 \pm 0.07$  (for  $K = 7$ ) compared to an average correlation of  $r = 0.71 \pm 0.1$  for CLR-  
245 SSVD. Collectively, these results show that EMBED identifies key ecological normal modes that  
246 can accurately represent collective abundance fluctuations in microbiome time series. Notably,  
247 a much smaller number of EMBED modes are sufficient to accurately capture the abundance  
248 dynamics compared to CLR-SSVD.

249



250 We next sought to identify underlying ecological modes of dynamics in the gut microbiome by  
251 using EMBED to reconstruct low-dimensional representations of bacterial communities  
252 subjected to various ecological perturbations.

253

254

255

256

257 **Effect of dietary oscillations on the gut microbiome**

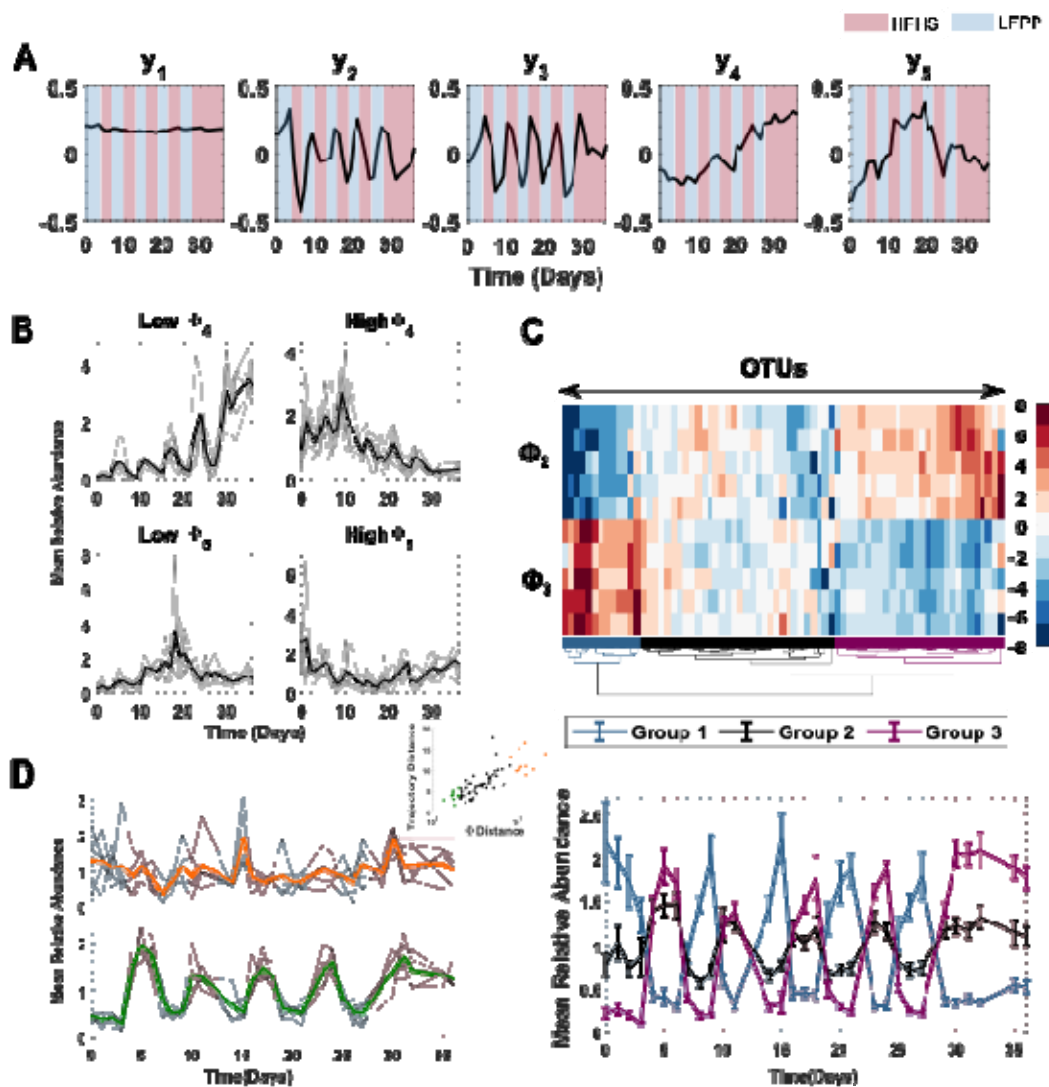

258

259 **Figure 2. The effect of diet on microbiome dynamics.** (A) Temporal profiles of the five inferred ECNs.  
260 Blue and red panels show periods of time of administered LFPP and HFHS diets respectively. (B) (Top)  
261 The average abundances of five OTUs with the most negative and the most positive  $\phi$  values. (Bottom)

262 The average abundances of five OTUs with the most negative and the most positive  $\Phi_5$  values. For each  
263 subject, the abundances of the identified OTUs were first mean-normalized across each OTU, then  
264 averaged across the OTUs (faint lines). The bold lines show abundances averaged across all subjects. (C)  
265 (Top) A hierarchical clustering of OTUs using the two oscillatory loadings  $\Phi_2$  and  $\Phi_3$  identifies three  
266 major groups of OTUs (colored). (Bottom) Mean relative abundance of OTUs in the three groups using  
267 the same colors as the top panel. The abundances were first mean-normalized on a per OTU basis, then  
268 averaged across subjects for each OTU, and then averaged across all OTUs in any given group. The error  
269 bars represent standard errors of mean estimated using the considered OTUs. (D) Abundance variation  
270 in top 10 OTUs that exhibit universal dynamics (green) and top 10 OTUs that show subject-specific  
271 dynamics (orange) as identified by the average subject-to-subject variability in OTU-specific  $\Phi$  loadings  
272 (inset).

273

274 Host diet has been shown to be a major factor influencing gut bacterial dynamics in both  
275 humans and mice<sup>24,25</sup> but in a subject specific manner<sup>37</sup>. We therefore applied EMBED to the  
276 data collected by Carmody et. al.<sup>25</sup> to better understand bacterial abundance changes in  
277 response to highly controlled dietary perturbations. Briefly, the diets of individually housed  
278 mice were alternated every  $\sim 3$  days between a low-fat, plant-polysaccharide diet (LFPP) and a  
279 high-fat, high-sugar diet (HFHS). Daily fecal samples were collected for over a month (SI Fig. 6).

280

281 Using  $K = 5$  ECNs, EMBED obtained a lower dimensional time series approximation that  
282 reconstruction of the original data with great accuracy (average taxa Pearson correlation  
283 coefficient  $r = 0.75 \pm 0.18$ , average community Pearson correlation coefficient,  $r = 0.98 \pm$   
284  $0.003$ ) (SI Fig. 2). We investigated each of the underlying ECNs. The first ECN  $y_1(t)$  represented  
285 a relatively constant abundance throughout the entire time series (Fig. 2A). Moreover, the  
286 corresponding loading vector  $\Phi_1$  showed a significant correlation to the average individual OTU  
287 abundance across time. (Average Spearman correlation coefficient across subjects,  $r =$   
288  $-0.86 \pm 0.06$ , SI Fig. 4), suggesting that despite large-scale, cyclic dietary changes, gut bacterial  
289 abundances in the community tended to fluctuate around a constant average abundance.

290

291 In contrast, ECNs  $y_2(t)$  and  $y_3(t)$  collectively captured the cyclic nature of dietary oscillations,  
292 confirming that the murine diet rapidly and reproducibly alters abundance dynamics even at  
293 the individual OTU level. To identify OTUs whose oscillatory dynamics were similar across  
294 subjects, we clustered the loadings  $\Phi_2$  and  $\Phi_3$  of individual OTUs on ECNs  $y_2(t)$  and  $y_3(t)$ . We  
295 found that bacteria in the community largely clustered into three groups (Fig. 2C), those whose

296 abundances increased with the LFPP diet (blue, group 1), and those whose abundances  
297 increased with the HFHS diet to different extents (black and magenta, groups 2 & 3). In keeping  
298 with recent studies<sup>38-40</sup>, we found that the genera *Saccharicrinis*, members of the Bacteroidetes  
299 phylum, were significantly enriched in group 3, consistent with the notion that bacteria  
300 belonging to this genera are able to degrade plant polysaccharides and utilize the metabolic  
301 byproducts present in the LFPP diet ( $p = 0.0015$ , hypergeometric test).

302

303 Unexpectedly, we found two ECNs  $y_4(t)$  and  $y_5(t)$  that represented profound non-oscillatory  
304 behavior in abundance fluctuations.  $y_4(t)$  represented an overall drift in abundance over the  
305 time series and  $y_5(t)$  represented a U-shaped recovery. The loadings corresponding to these  
306 two modes were significantly correlated across subjects (Spearman correlation coefficient  
307  $r = 0.37 \pm 0.16$ , averaged across mice). The top 5 OTUs with most negative and positive  
308 loadings  $\Phi_4$  (omitting OTUs that were also in the top 5 negative/positive for loadings  $\Phi_5$ )  
309 experienced a significant, irreversible increase and decrease throughout the time course of the  
310 experiment respectively (Fig. 2B, top). Thus, while the dynamics of most gut bacteria in this  
311 community exhibit rapid and reversible changes in response to dietary oscillations, there exist  
312 certain bacteria that exhibit irreversible changes over time. This concept of *hysteresis* has been  
313 explored previously in the gut microbiome<sup>25,41</sup>, but the underlying mechanisms likely warrant  
314 continued investigation. In contrast, the top 5 OTUs with most negative and positive loadings  
315  $\Phi_5$  (omitting OTUs that were also in the top 5 negative/positive for loadings  $\Phi_4$ ) experienced  
316 an inverted U-shaped and a U-shaped abundance profile (Fig. 2B, bottom). Interestingly, the  
317 OTUs that exhibited the drifting and the U-shaped abundance profiles differed from subject-to-  
318 subject (SI Table 2, SI Fig. 6). This strongly suggests that these universal non-oscillatory  
319 dynamics are primarily driven by the state of the ecosystem rather than specific functions of  
320 the bacterial taxa that exhibit these behaviors. This is reminiscent of the universal dynamical  
321 behaviors recently reported by Ji et al.<sup>14</sup> that were shared across different host organisms but  
322 were exhibited by different bacterial taxa.

323

324 EMBED systematically identifies OTUs that exhibit universal dynamics and those that exhibit  
325 subject-specific behavior. Each OTU within each subject-specific ecosystem is characterized by a  
326 five-dimensional vector of loadings corresponding to the five ECNs. OTUs whose loading vectors  
327 are similar across all subjects have similar dynamics across subjects and vice-versa for OTUs  
328 with different loading vectors. To identify these universal and subject specific OTUs, we  
329 computed the average distance across all pairs of subjects of the OTU specific loadings vectors.  
330 This average distance correlated strongly with the average distance of the subject specific OTU  
331 abundance trajectories as well (inset of Fig. 2D). In Fig. 2D, we plot the average abundance of  
332 10 OTUs with the most similar  $\Phi$  loadings (bottom) and the 10 most dissimilar  $\Phi$  loadings (top).  
333 The black lines show the OTU-averaged abundances for individual subjects and the colored bold  
334 lines (green and orange) show the average across subjects. As seen in Fig. 2D, the top 10 OTUs  
335 whose dynamics were similar across all subjects strongly preferred the HFHS diet. Notably,  
336 these OTUs are overrepresented by the genus *Oscillibacter* (4 out of 10 compared to 5 out of  
337 73, Hypergeometric test  $p = 9 \times 10^{-4}$ ). Interestingly, this overrepresentation was found at the  
338 genus and the family level and was *not* observed at higher taxonomic classifications (SI Table 3).  
339 Importantly, no other genus or family were overrepresented. This strongly suggests a specific  
340 genus level preference to high fat high sugar diet in the genus *Oscillibacter* that can override  
341 subject-specific ecosystem parameters. Notably, *Oscillibacter* are known to prefer high fat<sup>42</sup> as  
342 well as high sugar diets<sup>43</sup>. Future work is needed to further establish the mechanistic  
343 connection between *Oscillibacter* and HFHS diets.

344

#### 345 **ECNs identify modes of recovery of bacteria under antibiotic action**

346 Broad-spectrum oral antibiotics have significant effects on the gut flora both during and after  
347 administration. Specifically, microbiome abundance dynamics following antibiotic  
348 administration can potentially exhibit a combination of several typical behaviors which may  
349 reflect different survival strategies<sup>7,9,10,16,44</sup>. These include quick recovery following removal of  
350 antibiotic, slow but partial recovery, and one-time changes followed by resilience to repeat  
351 antibiotic treatment. The temporal variation in abundances of any bacteria could be a  
352 combination of these typical behaviors. Moreover, given that the gut ecosystems differ across

353 different hosts, the response of specific bacteria to the same antibiotic treatment could vary  
354 from host to host<sup>16</sup>. To better parse the major modes of gut bacterial dynamics associated with  
355 antibiotic administration, we analyzed the data collected by Ng et al.<sup>10</sup>. Briefly, several mice  
356 were given the antibiotic ciprofloxacin in two regimens (day 1-4 and day 14-18) and fecal  
357 microbiome samples were collected daily over a period of 30 days (SI Fig. 7).

358

359

360

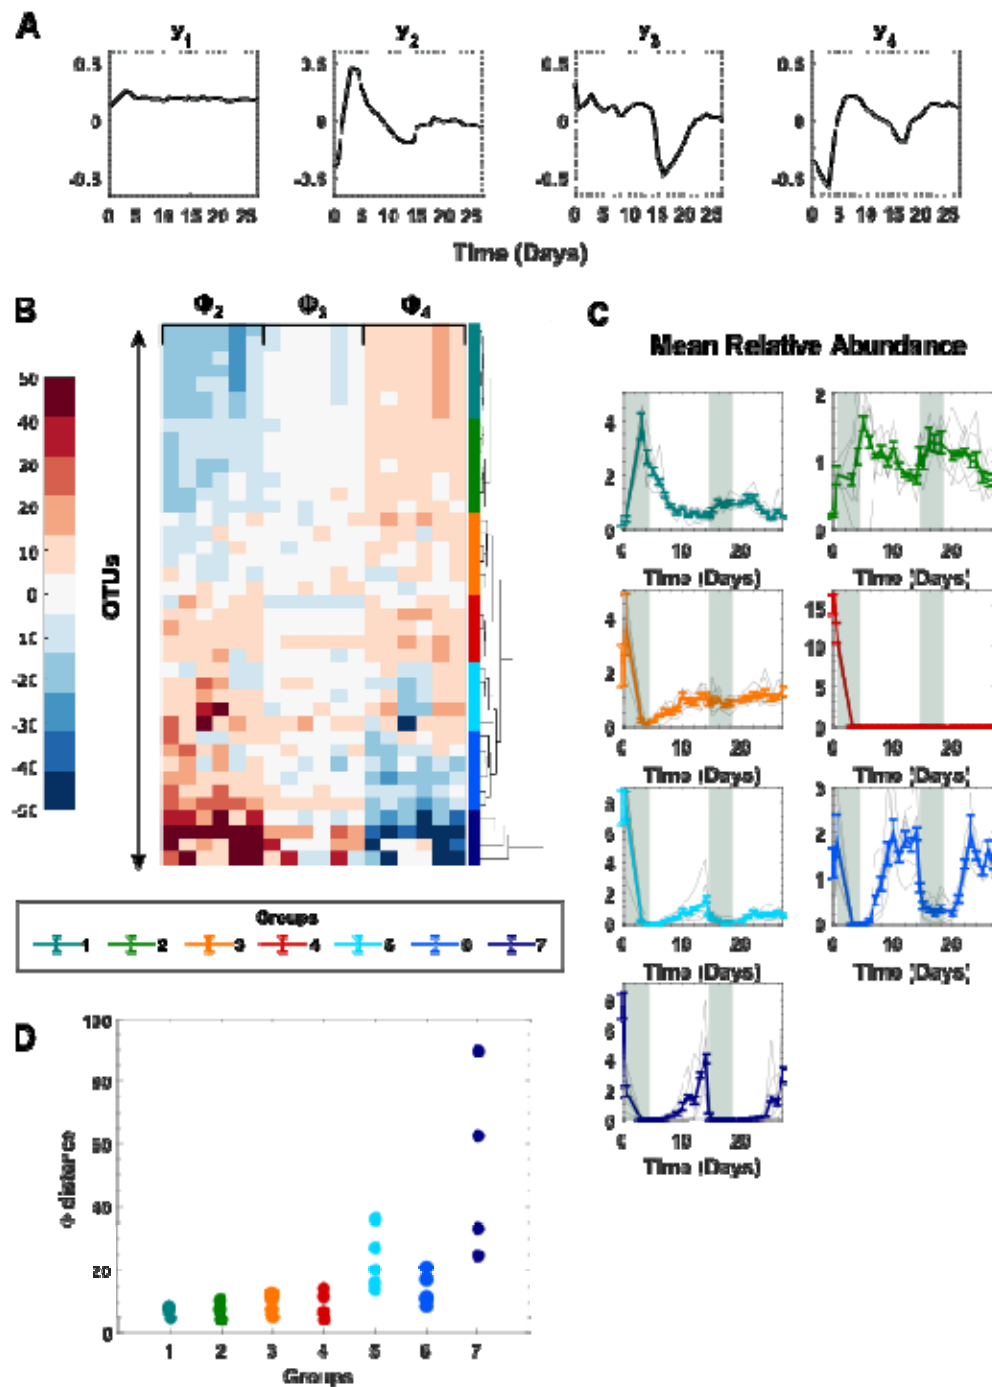

361

362 **Figure 3. Effect of antibiotic treatment on the gut microbiome.** (A) ECNs describe the  
 363 microbiome of mice on antibiotics. The shaded region indicates the first and second doses of  
 364 ciprofloxacin. (B) A hierarchical clustering of OTUs using loadings except for . 7 major groups of OTUs  
 365 with similar dynamical responses are identified from the clustering. (C) In every group and for each  
 366 subject, the abundances of the identified OTUs were first mean-normalized at the OTU level. The faint  
 367 lines represent subject-specific average over OTUs. The bold lines represent average across subjects.

368 Error bars represent standard errors of mean estimated using the considered OTUs. (D) Average subject-  
369 to-subject variability in OTU-specific  $\Phi$  loadings for the 7 identified groups.

370

371 We found that a very small number  $K = 4$  ECNs was sufficient to capture the data with  
372 significant accuracy (average taxa Pearson correlation coefficient  $r = 0.80 \pm 0.2$ , average  
373 community Pearson correlation coefficient,  $r = 0.98 \pm 0.01$ ) (SI Fig. 2). As shown in panel (A)  
374 of Fig. 3 and consistent with the previous analysis, we found that ECN  $y_1(t)$  was relatively  
375 stable throughout the study and the corresponding loading vector  $\Phi_1$  was strongly correlated  
376 with the mean OTU abundance over time (Spearman correlation coefficient  $r = -0.57 \pm 0.07$ )  
377 (SI Fig. 4). This suggests that on average, even after several large-scale perturbations, there  
378 exists a characteristic range of abundances beyond which individual OTUs tend not to deviate,  
379 at least on the time scale considered. Interestingly, we found the remaining several ECNs to  
380 follow broad classes of behaviors in response to periods of stress. Indeed, ECNs,  $y_2(t)$   
381 appeared to represent an inelastic one-time change followed by a relatively stable response.  
382 ECN,  $y_3(t)$  represented the opposite, it responded to the antibiotic treatment the second time  
383 but not the first time. In contrast, ECN  $y_4(t)$  represented *elastic* changes in the microbiome,  
384 potentially representing abundances reproducibly decreasing (or increasing) with the action of  
385 the antibiotic but quickly bouncing back to pre-antibiotic levels when it was withdrawn.

386

387 These salient dynamical features were captured when we clustered the OTUs using the loadings  
388  $\Phi_2 - \Phi_4$  (panel B), which identified seven major groups of OTUs with distinct dynamical  
389 behaviors (Figure 3B,C). Interestingly, while some of the groups simply reflected behaviors of  
390 individual ECNs, others could be understood according to their relative contributions across  
391 multiple ECNs. For example, the behavior of OTUs in groups 1 and 3 aligned with ECN  $y_2(t)$ ,  
392 albeit with opposing trends. Group 1 OTUs flourished during the first antibiotic treatment but  
393 the second treatment did not elicit a similar response. In contrast, OTUs in group 3 diminished  
394 in their abundance after the first antibiotic treatment but were resistant to subsequent  
395 antibiotic action.

396

397 OTUs in groups 2, 5, 6, and 7 displayed highly elastic dynamics in response to both periods of  
398 antibiotic administration. Group 2 OTUs overrepresented by the genus *Akkermansia* (all 2 out  
399 of 41 OTUs are in Group 2, Hypergeometric test  $p = 0.026$ ) flourished during the antibiotic  
400 treatment but decreased their abundance in a reversible manner when antibiotics were  
401 withdrawn. OTUs in groups 5, 6, and 7 in contrast diminished their abundance in the presence  
402 of antibiotics in a reversible manner. Group 6 was overrepresented by the genus *Blautia* (3 out  
403 of 6 compared to 5 out of 41, Hypergeometric test  $p = 0.017$ ), while group 7 was  
404 overrepresented by the genus *Aestuariuspira* (all 2 out of 41 OTUs are in Group 7,  
405 Hypergeometric test  $p = 0.0073$ ). Finally, group 4 comprised OTUs that were exquisitely  
406 sensitive to initial antibiotic administration, whose abundance did not make any meaningful  
407 recovery. These OTUs were overrepresented in the genus *Coprobacter* (2 out of 5 compared to  
408 3 out of 41, Hypergeometric test  $p = 0.035$ ).

409  
410 Notably, OTUs in groups 5 and 7 exhibited significant subject-to-subject variability as quantified  
411 by both the average subject-to-subject variability in OTU-specific  $\Phi$  loadings (Fig. 3D) and the  
412 subject-to-subject variability in OTU-specific abundance trajectories (SI Fig. 7). While these  
413 OTUs exhibited qualitative dynamics of recovery across all subjects (SI Fig. 7), the time course  
414 and the extent of recovery varied from subject-to-subject.

415

## 416 Discussion

417 Bacteria in host-associated microbiomes live in complex ecological communities governed by  
418 competitive and cooperative interactions, and a constantly changing environment. Extensive  
419 spatial and temporal variability are a hallmark of these communities. Recent systems biology  
420 approaches have made progress in distilling some of this complexity by utilizing generalized  
421 quantitative frameworks. For example, simple and universal statistical features have recently  
422 been discovered in these communities<sup>14,15</sup>. Dimensionality reduction offers an alternative  
423 approach by leveraging the correlated nature of bacterial abundance fluctuations in the  
424 community, but its use towards understanding microbiome dynamics has thus far been limited.

425



426 To address this issue, we developed EMBED, essential microbiome dynamics. EMBED is a novel  
427 dimensionality reduction approach specifically tailored to identify the underlying ecological  
428 normal modes in the dynamics of bacterial communities that are shared across subjects  
429 undergoing identical environmental perturbations. These ECNs can be viewed as dynamical  
430 templates along which the trajectories of individual bacteria within individual host ecosystems  
431 can be decomposed. Identified ECNs shed insight into the underlying structure of bacterial  
432 community dynamics. By applying EMBED to several times series data sets representing major  
433 ecological perturbations, we identified immediate and reversible changes to the gut community  
434 in response to these stimuli. However, EMBED also identified more subtle, longer-term, and  
435 perhaps irreversible changes to specific members of the community, the mechanisms and  
436 consequences of which would be interesting to pursue further. For example, EMBED identified  
437 genus levels associations with specific dynamical behaviors under diet oscillations that were not  
438 observed at higher taxonomic levels, potentially implicating specific functional properties of the  
439 genus.

440

441 One key parameter in EMBED is the number of components. A high number of components will  
442 necessarily fit the data better, potentially fitting to the technical noise. How do we decide the  
443 appropriate number of components? Importantly, EMBED is a probabilistic model and  
444 potentially information theoretic criteria<sup>45,46</sup> could be used to identify the correct number of  
445 components. These criteria seek a balance between increase in number of parameters and the  
446 accuracy of fit to data (likelihood). We note that the total likelihood of the data is linearly  
447 proportional to the sequencing depth. However, the reported sequencing depth is typically  
448 over-inflated compared to the true nucleotide capture probability of the experiments<sup>47</sup> leading  
449 to an inflated estimate of the total likelihood. One approach to solve this is to obtain technical  
450 repeats which can in turn allow us to estimate the true technical noise<sup>13,47</sup>.

451

452 While EMBED was specifically developed to study microbiomes, it reflects a more generalizable  
453 framework that can easily be applied to other types of longitudinal sequencing data as well. We

454 therefore expect that EMBED will be a significant tool in the analysis of dynamics of high  
455 dimensional sequencing data beyond the microbiome.

456

## 457 References

458

- 459 1. Caporaso, J. G. *et al.* Global patterns of 16S rRNA diversity at a depth of millions of sequences per  
460 sample. *Proc. Natl. Acad. Sci.* **108**, 4516–4522 (2011).
- 461 2. Kozich, J. J., Westcott, S. L., Baxter, N. T., Highlander, S. K. & Schloss, P. D. Development of a Dual-  
462 Index Sequencing Strategy and Curation Pipeline for Analyzing Amplicon Sequence Data on the MiSeq  
463 Illumina Sequencing Platform. *Appl. Environ. Microbiol.* **79**, 5112–5120 (2013).
- 464 3. Stewart, C. J. *et al.* Temporal development of the gut microbiome in early childhood from the TEDDY  
465 study. *Nature* **562**, 583–588 (2018).
- 466 4. Vatanen, T. *et al.* Genomic variation and strain-specific functional adaptation in the human gut  
467 microbiome during early life. *Nat. Microbiol.* **4**, 470–479 (2019).
- 468 5. Peled, J. U. *et al.* Microbiota as Predictor of Mortality in Allogeneic Hematopoietic-Cell  
469 Transplantation. *N. Engl. J. Med.* **382**, 822–834 (2020).
- 470 6. Buffie, C. G. *et al.* Precision microbiome reconstitution restores bile acid mediated resistance to  
471 *Clostridium difficile*. *Nature* **517**, 205–208 (2015).
- 472 7. Suez, J. *et al.* Post-Antibiotic Gut Mucosal Microbiome Reconstitution Is Impaired by Probiotics and  
473 Improved by Autologous FMT. *Cell* **174**, 1406-1423.e16 (2018).
- 474 8. Zmora, N. *et al.* Personalized Gut Mucosal Colonization Resistance to Empiric Probiotics Is Associated  
475 with Unique Host and Microbiome Features. *Cell* **174**, 1388-1405.e21 (2018).
- 476 9. Kim, S. G. *et al.* Microbiota-derived lantibiotic restores resistance against vancomycin-resistant  
477 *Enterococcus*. *Nature* **572**, 665–669 (2019).
- 478 10. Ng, K. M. *et al.* Recovery of the Gut Microbiota after Antibiotics Depends on Host Diet,  
479 Community Context, and Environmental Reservoirs. *Cell Host Microbe* **26**, 650-665.e4 (2019).
- 480 11. Caporaso, J. G. *et al.* Moving pictures of the human microbiome. *Genome Biol.* **12**, R50 (2011).
- 481 12. David, L. A. *et al.* Host lifestyle affects human microbiota on daily timescales. *Genome Biol.* **15**,  
482 R89 (2014).
- 483 13. Ji, B. W. *et al.* Quantifying spatiotemporal variability and noise in absolute microbiota  
484 abundances using replicate sampling. *Nat. Methods* **16**, 731–736 (2019).
- 485 14. Ji, B. W., Sheth, R. U., Dixit, P. D., Tchourine, K. & Vitkup, D. Macroecological dynamics of gut  
486 microbiota. *Nat. Microbiol.* **5**, 768–775 (2020).
- 487 15. Grilli, J. Macroecological laws describe variation and diversity in microbial communities. *Nat.*  
488 *Commun.* **11**, 4743 (2020).
- 489 16. Dethlefsen, L. & Relman, D. A. Incomplete recovery and individualized responses of the human  
490 distal gut microbiota to repeated antibiotic perturbation. *Proc. Natl. Acad. Sci.* **108**, 4554–4561  
491 (2011).
- 492 17. Lozupone, C. A., Stombaugh, J. I., Gordon, J. I., Jansson, J. K. & Knight, R. Diversity, stability and  
493 resilience of the human gut microbiota. *Nature* **489**, 220–230 (2012).
- 494 18. Faith, J. J. *et al.* The Long-Term Stability of the Human Gut Microbiota. *Science* **341**, (2013).
- 495 19. Coyte, K. Z., Schluter, J. & Foster, K. R. The ecology of the microbiome: Networks, competition,  
496 and stability. *Science* **350**, 663–666 (2015).
- 497 20. Zaoli, S. & Grilli, J. A macroecological description of alternative stable states reproduces intra-  
498 and inter-host variability of gut microbiome. *bioRxiv* 2021.02.12.430897 (2021).

- 499 21. Äijö, T., Müller, C. L. & Bonneau, R. Temporal probabilistic modeling of bacterial compositions  
500 derived from 16S rRNA sequencing. *Bioinformatics* **34**, 372–380 (2018).
- 501 22. Silverman, J. D., Durand, H. K., Bloom, R. J., Mukherjee, S. & David, L. A. Dynamic linear models  
502 guide design and analysis of microbiota studies within artificial human guts. *Microbiome* **6**, 202  
503 (2018).
- 504 23. Joseph, T. A., Pasarkar, A. P. & Pe'er, I. Efficient and Accurate Inference of Mixed Microbial  
505 Population Trajectories from Longitudinal Count Data. *Cell Syst.* **10**, 463–469.e6 (2020).
- 506 24. David, L. A. *et al.* Diet rapidly and reproducibly alters the human gut microbiome. *Nature* **505**,  
507 559–563 (2014).
- 508 25. Carmody, R. N. *et al.* Diet Dominates Host Genotype in Shaping the Murine Gut Microbiota. *Cell*  
509 *Host Microbe* **17**, 72–84 (2015).
- 510 26. Maier, L. *et al.* Extensive impact of non-antibiotic drugs on human gut bacteria. *Nature* **555**,  
511 623–628 (2018).
- 512 27. Moon, K. R. *et al.* Manifold learning-based methods for analyzing single-cell RNA-sequencing  
513 data. *Curr. Opin. Syst. Biol.* **7**, 36–46 (2018).
- 514 28. Costello, E. K. *et al.* Bacterial Community Variation in Human Body Habitats Across Space and  
515 Time. *Science* **326**, 1694–1697 (2009).
- 516 29. Huttenhower, C. *et al.* Structure, function and diversity of the healthy human microbiome.  
517 *Nature* **486**, 207–214 (2012).
- 518 30. Lloyd-Price, J. *et al.* Strains, functions and dynamics in the expanded Human Microbiome  
519 Project. *Nature* **550**, 61–66 (2017).
- 520 31. Martino, C. *et al.* A Novel Sparse Compositional Technique Reveals Microbial Perturbations.  
521 *mSystems* **4**, (2019).
- 522 32. Martino, C. *et al.* Context-aware dimensionality reduction deconvolutes gut microbial  
523 community dynamics. *Nat. Biotechnol.* **39**, 165–168 (2021).
- 524 33. Dixit, P. D. Thermodynamic inference of data manifolds. *Phys. Rev. Res.* **2**, 023201 (2020).
- 525 34. Cui, Q. & Bahar, I. *Normal Mode Analysis: Theory and Applications to Biological and Chemical*  
526 *Systems*. (CRC Press, 2005).
- 527 35. Aitchison, J. The Statistical Analysis of Compositional Data. *J. R. Stat. Soc. Ser. B Methodol.* **44**,  
528 139–160 (1982).
- 529 36. Keshavan, R. H., Montanari, A. & Oh, S. Matrix Completion From a Few Entries. *IEEE Trans. Inf.*  
530 *Theory* **56**, 2980–2998 (2010).
- 531 37. Zeevi, D. *et al.* Personalized Nutrition by Prediction of Glycemic Responses. *Cell* **163**, 1079–1094  
532 (2015).
- 533 38. Johnson, E. L., Heaver, S. L., Walters, W. A. & Ley, R. E. Microbiome and metabolic disease:  
534 revisiting the bacterial phylum Bacteroidetes. *J. Mol. Med.* **95**, 1–8 (2017).
- 535 39. Gao, J. *et al.* Predictive functional profiling using marker gene sequences and community  
536 diversity analyses of microbes in full-scale anaerobic sludge digesters. *Bioprocess Biosyst. Eng.* **39**,  
537 1115–1127 (2016).
- 538 40. Leadbeater, D. R. *et al.* Mechanistic strategies of microbial communities regulating lignocellulose  
539 deconstruction in a UK salt marsh. *Microbiome* **9**, 48 (2021).
- 540 41. Sonnenburg, E. D. *et al.* Diet-induced extinctions in the gut microbiota compound over  
541 generations. *Nature* **529**, 212–215 (2016).
- 542 42. Lam, Y. Y. *et al.* Increased Gut Permeability and Microbiota Change Associate with Mesenteric  
543 Fat Inflammation and Metabolic Dysfunction in Diet-Induced Obese Mice. *PLoS ONE* **7**, e34233  
544 (2012).
- 545 43. Kong, C., Gao, R., Yan, X., Huang, L. & Qin, H. Probiotics improve gut microbiota dysbiosis in  
546 obese mice fed a high-fat or high-sucrose diet. *Nutrition* **60**, 175–184 (2019).

- 547 44. Balaban, N. Q., Merrin, J., Chait, R., Kowalik, L. & Leibler, S. Bacterial Persistence as a Phenotypic  
548 Switch. *Science* **305**, 1622–1625 (2004).
- 549 45. Akaike, H. Information Theory and an Extension of the Maximum Likelihood Principle. in  
550 *Selected Papers of Hirotugu Akaike* (eds. Parzen, E., Tanabe, K. & Kitagawa, G.) 199–213 (Springer  
551 New York, 1998). doi:10.1007/978-1-4612-1694-0\_15.
- 552 46. Neath, A. A. & Cavanaugh, J. E. The Bayesian information criterion: background, derivation, and  
553 applications. *WIREs Comput. Stat.* **4**, 199–203 (2012).
- 554 47. Stadinski, B. D. *et al.* Hydrophobic CDR3 residues promote the development of self-reactive T  
555 cells. *Nat. Immunol.* **17**, 946–955 (2016).
- 556
